# Supplementary material for: Effective La-Na Co-Doped TiO2 Nano-Particles for Dye Adsorption: Synthesis, Characterization and Study on Adsorption Kinetics
Source: MDPI journal article supplement (doi:10.3390/nano9030400), 2019-03-09
Supplement: s1 [file s1]

## **Supplementary File**

### **Effective La-Na co-doped TiO<sub>2</sub> nano-particles adsorbent for dye removal: Synthesis, characterization and study on adsorption kinetics.**

Inderjeet Singh and Balaji Birajdar\*

Special Centre for Nano Sciences, Jawaharlal Nehru University, New Delhi-110067,

India

Corresponding Author: [birajdar@mail.jnu.ac.in](mailto:birajdar@mail.jnu.ac.in)

Corresponding Author, Tel: +91 112670474

#### **Figure caption:**

**Fig. S1** High resolution XPS spectra of Ti 2p of prepared samples.

**Fig. S2** High resolution XPS spectra of La 3d of prepared samples.

**Fig. S3** High resolution XPS spectra of Na 1s of prepared samples.

**Fig. S4 (a)** Effect of pH on absorbance spectra of MB dye. **(b)** Amplified image of (a) at pH 7 and pH 9.

#### **Table caption:**

**Table S1** Area under different peaks obtained from high resolution XPS of different samples.

**Table S2** FWHM of different peaks obtained from high resolution XPS of different samples.

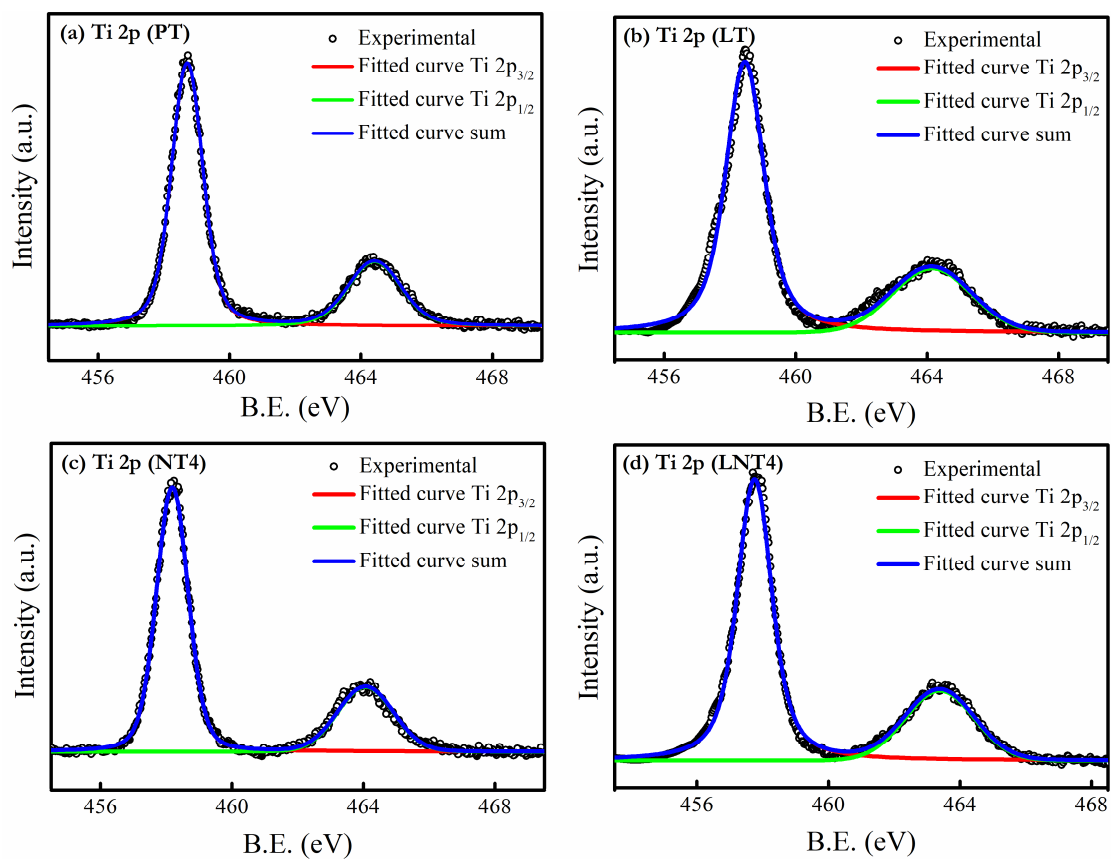

**Fig. S1** High resolution XPS spectra of Ti 2p.

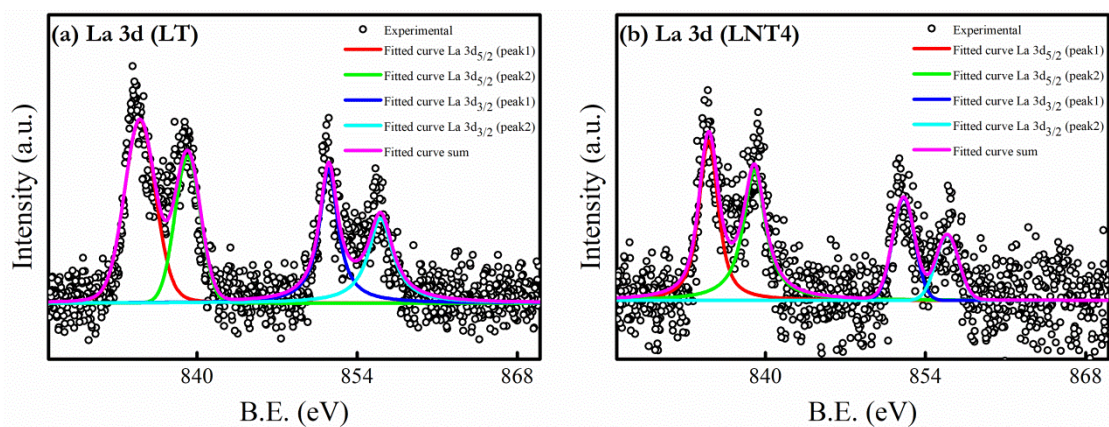

**Fig. S2** High resolution XPS spectra of La 3d.

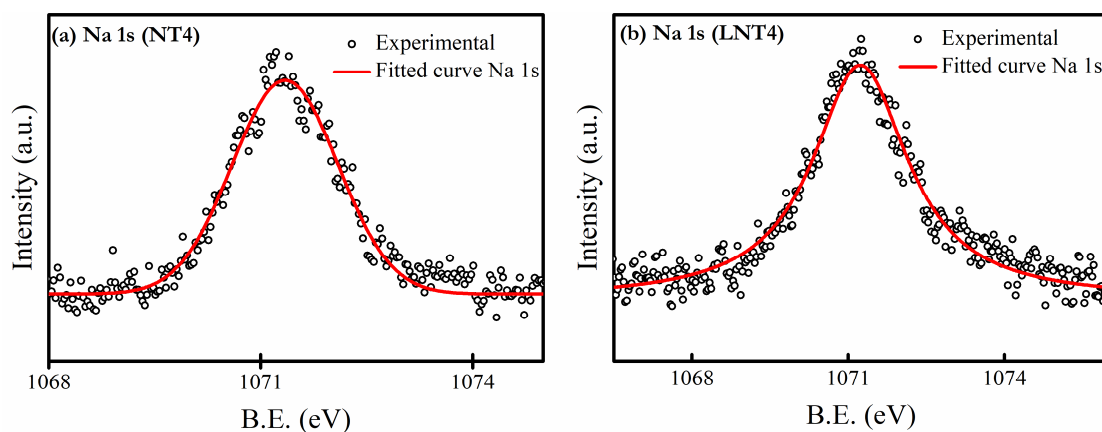

**Fig. S3** High resolution XPS spectra of Na 1s.

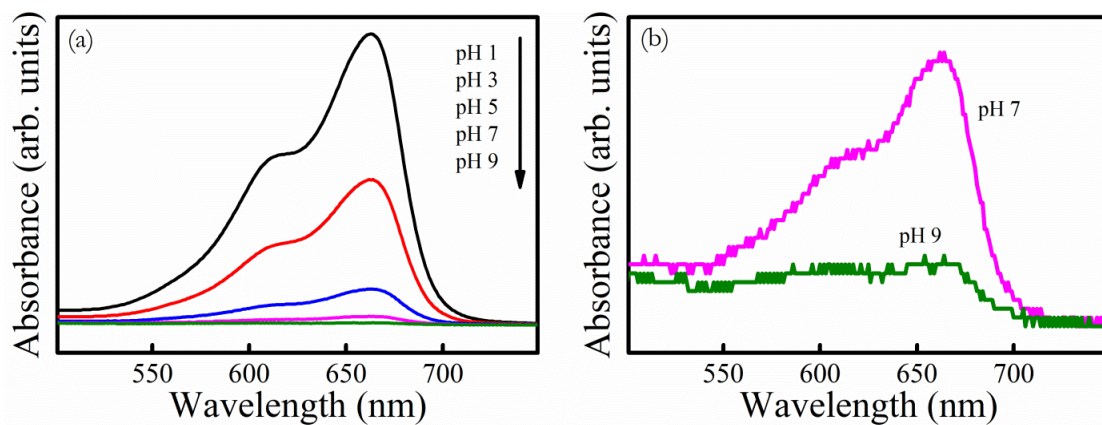

**Fig. S4** (a) Effect of pH on absorbance spectra of MB dye. (b) Amplified image of (a) at pH 7 and pH 9.

**Table S1** Area under different peaks obtained from high resolution XPS of different samples.

| Sample | Area under   |          |                              |                              |                      |         |                      |         |               |
|--------|--------------|----------|------------------------------|------------------------------|----------------------|---------|----------------------|---------|---------------|
|        | Ti-O<br>peak | O-H peak | Ti 2p <sub>3/2</sub><br>peak | Ti 2p <sub>1/2</sub><br>peak | La 3d <sub>5/2</sub> |         | La 3d <sub>3/2</sub> |         | Na 1s<br>peak |
|        |              |          |                              |                              | Peak 1               | Peak 2  | Peak 1               | Peak 2  |               |
| PT     | 8787.77      | 2526.69  | 6452.93                      | 2576.94                      | -                    | -       | -                    | -       | -             |
| LT     | 8921.57      | 3991.99  | 6362.42                      | 2475.54                      | 2782.12              | 1734.34 | 1733.14              | 1456.75 | -             |
| NT4    | 9334.62      | 4126.57  | 5770.72                      | 2280.54                      | -                    | -       | -                    | -       | 2452.25       |
| LNT4   | 9716.55      | 4273.79  | 5535.63                      | 2119.75                      | 1861.97              | 1310.98 | 696.09               | 459.29  | 1628.04       |

**Table S2** FWHM of different peaks obtained from high resolution XPS of different samples.

| Sample | FWHM         |          |                              |                              |                      |        |                      |        |               |
|--------|--------------|----------|------------------------------|------------------------------|----------------------|--------|----------------------|--------|---------------|
|        | Ti-O<br>peak | O-H peak | Ti 2p <sub>3/2</sub><br>peak | Ti 2p <sub>1/2</sub><br>peak | La 3d <sub>5/2</sub> |        | La 3d <sub>3/2</sub> |        | Na 1s<br>peak |
|        |              |          |                              |                              | Peak 1               | Peak 2 | Peak 1               | Peak 2 |               |
| PT     | 1.23         | 2.44     | 1.13                         | 1.92                         | -                    | -      | -                    | -      | -             |
| LT     | 1.22         | 2.45     | 1.21                         | 2.15                         | 3.21                 | 2.64   | 1.96                 | 2.61   | -             |
| NT4    | 1.24         | 2.64     | 1.14                         | 2.01                         |                      |        |                      |        | 2.23          |
| LNT4   | 1.20         | 1.86     | 1.20                         | 2.12                         | 2.03                 | 2.32   | 1.85                 | 2.36   | 1.77          |
